# Supplementary material
Source: MDPI journal article supplement (https://www.mdpi.com/2073-4344/12/5/527)
Supplement: s1 [file s1]

**Supplementary Materials for**  
***Flower-like Co<sub>3</sub>O<sub>4</sub> Catalysts for Efficient Catalytic Oxidation  
of Multi-pollutants from Diesel Exhaust***

Zihao Li <sup>1</sup>, Xianhuai Chen <sup>1</sup>, Jinghuan Chen <sup>2</sup>, Huazhen Chang <sup>3</sup>, Lei Ma <sup>1,\*</sup>, Naiqiang Yan <sup>1</sup>

<sup>1</sup> School of Environmental Science and Engineering, Shanghai Jiao Tong University, Shanghai 200240, China

<sup>2</sup> Key Laboratory of Microbial Technology for Industrial Pollution Control, School of Environment, Zhejiang University of Technology, Hangzhou, 310014, China

<sup>3</sup> School of Environment and Natural Resources, Renmin University of China, Beijing 100872, China

\*Correspondence to: [leima8@sjtu.edu.cn](mailto:leima8@sjtu.edu.cn)

**Table S1.** The comparison of catalytic activities of different catalysts towards CO, C<sub>3</sub>H<sub>6</sub>, and NO oxidation from diesel emissions.

| Samples                                                   | Reaction conditions                                                                                                                                                                                                 | CO                      |                         | C <sub>3</sub> H <sub>6</sub> |                         | NO                      | Ref.      |
|-----------------------------------------------------------|---------------------------------------------------------------------------------------------------------------------------------------------------------------------------------------------------------------------|-------------------------|-------------------------|-------------------------------|-------------------------|-------------------------|-----------|
|                                                           |                                                                                                                                                                                                                     | T <sub>50</sub><br>(°C) | T <sub>90</sub><br>(°C) | T <sub>50</sub><br>(°C)       | T <sub>90</sub><br>(°C) | T <sub>50</sub><br>(°C) |           |
| Pt/Co <sub>3</sub> O <sub>4</sub> -F                      | 4000 ppm CO, 1000 ppm C <sub>3</sub> H <sub>6</sub> , 500 ppm NO, and 10% O <sub>2</sub> balanced in N <sub>2</sub> , WHSV= 240, 000 mL g <sup>-1</sup> h <sup>-1</sup> .                                           | 158                     | 176                     | 204                           | 220                     | 211                     | This work |
| Pt/Al <sub>2</sub> O <sub>3</sub>                         | 1000 ppm of CO, 500 ppm of NO, 500 ppm of C <sub>3</sub> H <sub>6</sub> , 500 ppm of C <sub>3</sub> H <sub>8</sub> , 10% O <sub>2</sub> , and 5 % H <sub>2</sub> O balanced in Ar, GHSV = 22, 520 h <sup>-1</sup> . | 175                     | 247                     | 244                           | 252                     | 252                     | [1]       |
| Commercial DOC                                            | 5500 ppm CO, 600 ppm C <sub>3</sub> H <sub>6</sub> , 275 ppm NO, 2% O <sub>2</sub> , 10% CO <sub>2</sub> , and 5% H <sub>2</sub> O balanced in N <sub>2</sub> , GHSV=50, 000 h <sup>-1</sup>                        | 239                     | 248                     | 242                           | 249                     | -                       | [2]       |
| Pt-Pd/Al <sub>2</sub> O <sub>3</sub>                      | 3000 ppm CO, 1500 ppm C <sub>3</sub> H <sub>6</sub> , and 8% O <sub>2</sub> balanced in N <sub>2</sub> , WHSV= 292, 000 mL g <sup>-1</sup> h <sup>-1</sup> .                                                        | 218                     | 220                     | 219                           | 222                     | -                       | [3]       |
| CeO <sub>2</sub> -Co <sub>3</sub> O <sub>4</sub> nanorods | 4000 ppm CO, 1000 ppm C <sub>3</sub> H <sub>6</sub> , 500 ppm NO, 10% O <sub>2</sub> , and 5% H <sub>2</sub> O balanced in N <sub>2</sub> , WHSV = 240, 000 mL g <sup>-1</sup> h <sup>-1</sup> .                    | 170                     | 186                     | 229                           | 240                     | 275                     | [4]       |

**Table S2.** BET surface area and pore parameters of Pt/Co<sub>3</sub>O<sub>4</sub>-F and Co<sub>3</sub>O<sub>4</sub>-F catalysts.

| Samples                           | Surface area (m <sup>2</sup> /g) | Pore volume (cm <sup>3</sup> /g) | Pore diameter (nm) |
|-----------------------------------|----------------------------------|----------------------------------|--------------------|
| Co <sub>3</sub> O <sub>4</sub>    | 30.4                             | 0.089                            | 21.0               |
| Pt/Co <sub>3</sub> O <sub>4</sub> | 30.2                             | 0.090                            | 20.3               |

## References

1. Ho, P.H.; Woo, J.-W.; Feizie Ilmasani, R.; Han, J.; Olsson, L. The role of Pd–Pt interactions in the oxidation and sulfur resistance of bimetallic Pd–Pt/ $\gamma$ -Al<sub>2</sub>O<sub>3</sub> diesel oxidation catalysts. *Ind. Eng. Chem. Res.* **2021**, 60, 6596-6612. doi:10.1021/acs.iecr.0c05622.
2. Glover, L.; Douglas, R.; McCullough, G.; Keenan, M.; Revereault, P.; McAtee, C. Performance characterisation of a range of diesel oxidation catalysts: effect of Pt:Pd ratio on light off behaviour and nitrogen species formation. *SEA Int.* **2011**. doi:10.4271/2011-24-0193.
3. Hazlett, M.J.; Moses-Debusk, M.; Parks II, J.E.; Allard, L.F.; Epling, W.S. Kinetic and mechanistic study of bimetallic Pt-Pd/Al<sub>2</sub>O<sub>3</sub> catalysts for CO and C<sub>3</sub>H<sub>6</sub> oxidation. *Appl. Catal. B Environ.* **2017**, 202, 404-417. doi:10.1016/j.apcatb.2016.09.034.
4. Li, P.; Chen, X.; Ma, L.; Bhat, A.; Li, Y.; Schwank, J.W. Effect of Ce and La dopants in Co<sub>3</sub>O<sub>4</sub> nanorods on the catalytic activity of CO and C<sub>3</sub>H<sub>6</sub> oxidation. *Catal. Sci. Technol.* **2019**, 9, 1165-1177. doi:10.1039/C8CY02460J.
